# Supplementary material for: Suppression of the RAS/ERK pathway by Tmsb10 is the key step for promoting fetal Leydig cell differentiation from progenitors
Source: Research Square preprint supplement (doi:10.21203/rs.3.rs-1357916/v1), 2022-02-16
Supplement: Supplementary file 1 [file ff09f48a8146b681ec123512.pdf]

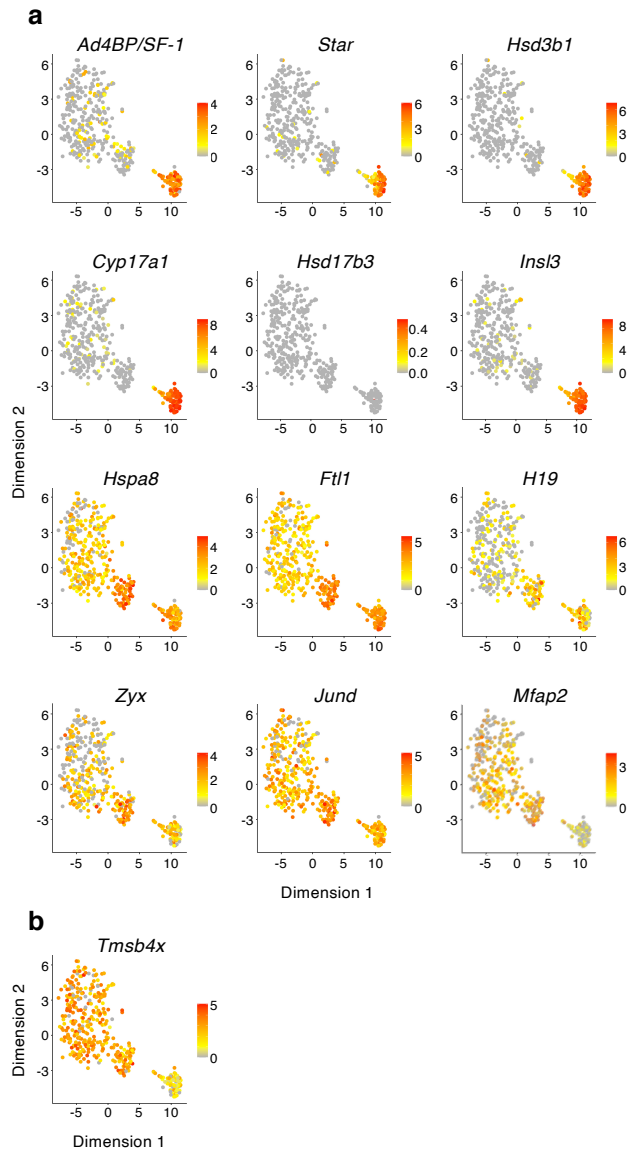

**Supplemental Fig. 1, Expression profiles of the genes classified into group-I to III**

Expression profiles of *Ad4BP/SF-1*, *Star*, *Hsd3b1*, *Cyp17a1*, *Hsd17b3*, and *Insl3* genes in group-I, *Hspa8*, *Ftl1*, and *H19* genes in group-II, and *Zyx*, *Jund*, and *Mfap2* genes in group-III are shown in **(a)**. As described previously, *Hsd17b3* required for testosterone production is not expressed in FLCs (Shima et al., 2013). *Tmsb4x* is shown in **(b)**. A dot represents a cell.

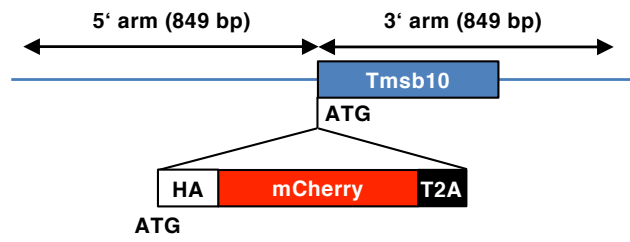

**Supplemental Fig. 2, Construction of *Tmsb10*-*mCherry* knock-in plasmid**

Construction of the *Tmsb10*-*mCherry* knock-in plasmid is illustrated. Preparation of the 5' and 3' arms and *mCherry* reporter gene tagged with human influenza hemagglutinin (HA) and *Thoseaassigna* virus 2A (T2A) are described in 'Materials and Methods'.

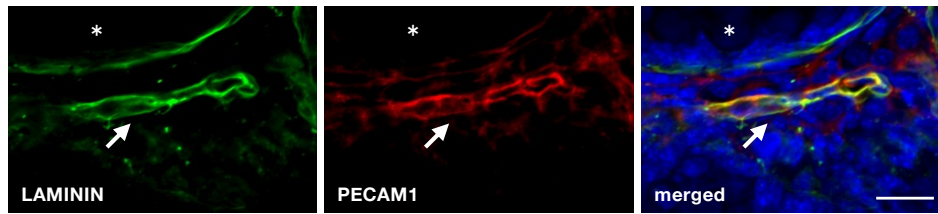

**Supplemental Fig. 3, Colocalization of LAMININ and PECAM1 in endothelial cells of mouse fetal testis**

*FLE-EGFP* mouse fetal testes at E16.5 were subjected to immunostaining. Immunofluorescence images of LAMININ (green) and PECAM1 (red), and merged image (merged) are shown. Arrows indicate LAMININ and PECAM1 double-positive endothelial cells. Asterisks mark testis tubules. Scale bar = 20  $\mu\text{m}$ .

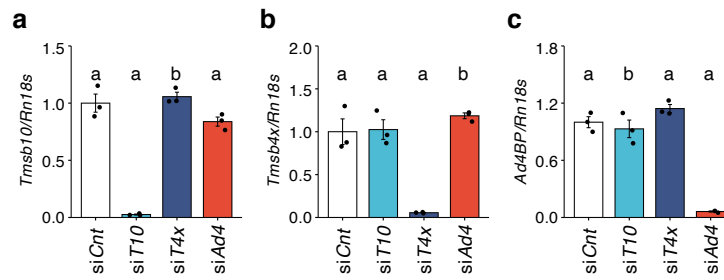

### Supplemental Fig. 4, Knockdown efficiencies by siRNA treatments

W-EGFP cells were prepared from *FLE-EGFP* fetal mouse testes at E16.5 and cultured as described in 'Materials and Methods'. They were treated with siRNA for control (si*Cnt*, open bars), *Tmsb10* (si*T10*, light blue bars), *Tmsb4x* (si*T4x*, dark blue bars), and *Ad4BP/SF-1* (si*Ad4*, red bars). The expressions of *Tmsb10* (**a**), *Tmsb4x* (**b**), and *Ad4BP/SF-1* (**c**) in the cells were examined by qRT-PCR. The data were normalized by *Rn18s* and presented as means  $\pm$  SEM. The different letters denote significant differences between the cell groups.  $n = 3$ .  $p < 0.001$ .

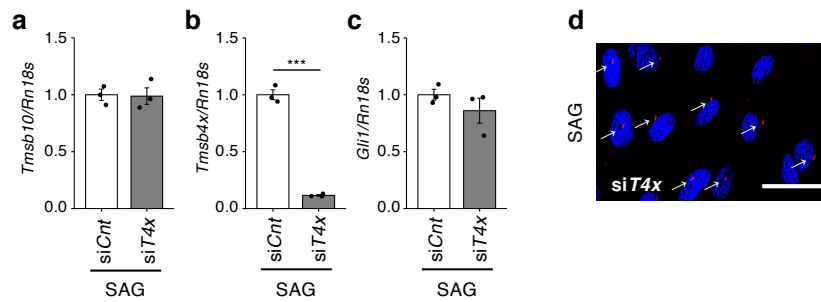

**Supplemental Fig. 5, Effects of *Tmsb4x* KD on *Gli1* gene expression and ciliogenesis in W-EGFP cells**

**(a-c)** W-EGFP cells were prepared from *FLE-EGFP* mouse fetal testes at E16.5 and cultured as described in ‘Materials and Methods’. They were treated with siRNA for *Tmsb4x* (siT4x, gray bars) or control siRNA (open bars). Expressions of *Tmsb10* **(a)**, *Tmsb4x* **(b)**, and *Gli1* **(c)** in the cells were examined by qRT-PCR. The data are standardized using *Rn18s*.  $n = 3$ . \*\*\* $p < 0.001$ . **(d)** Expression of ARL13B (red), a ciliary marker protein, in the W-EGFP cells treated with siT4x was examined by immunostaining. Arrows indicate primary cilia. Nuclei were stained with DAPI (blue). Arrow indicates primary cilia. Scale bar = 10  $\mu\text{m}$ .

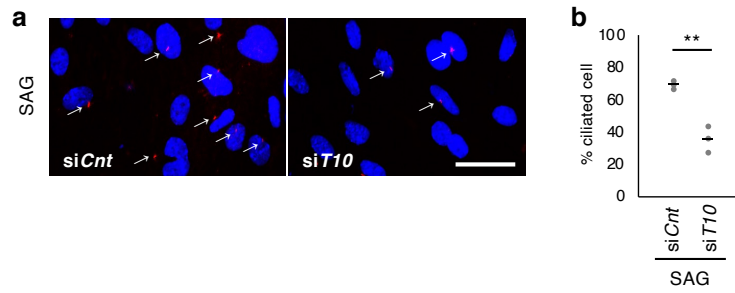

**Supplemental Fig. 6, Affected ciliogenesis in W-EGFP cells by *Tmsb10* KD in the presence of SAG**

**(a)** W-EGFP cells were treated with si*T10* or si*Cnt* in the presence of SAG. The presence of primary cilia was examined by immunostaining for ARL13B (red). Nuclei were stained with DAPI (blue). Arrows indicate primary cilia. Scale bar = 10  $\mu$ m. **(b)** Ciliated cells detected in the studies above were counted. Ratios of the ciliated cells are shown.  $n = 3$ .

\*\* $p < 0.01$ .

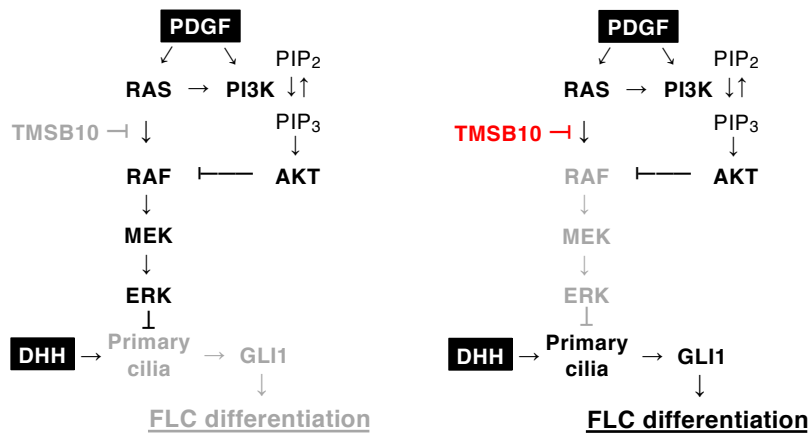

**Supplemental Fig. 7, Schematics of signal pathways regulating FLC differentiation and in which *Tmsb10* acts as a suppressor**

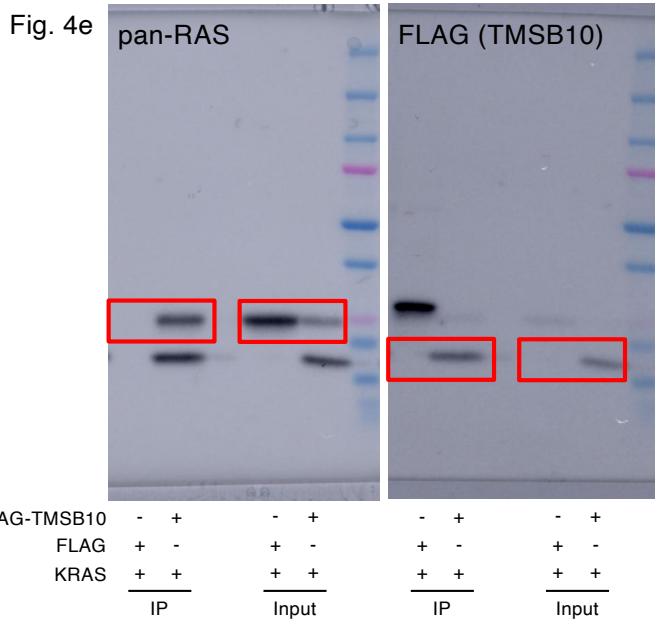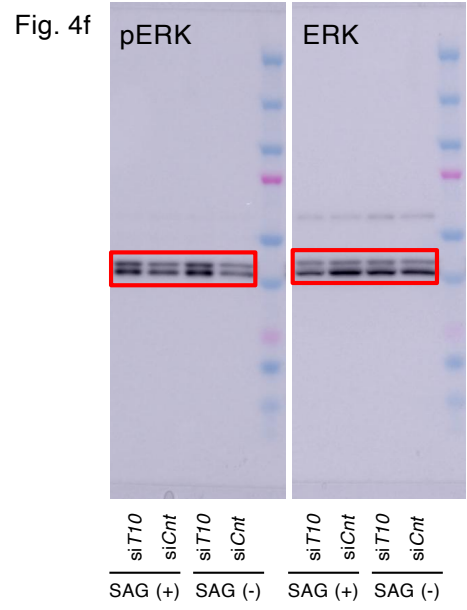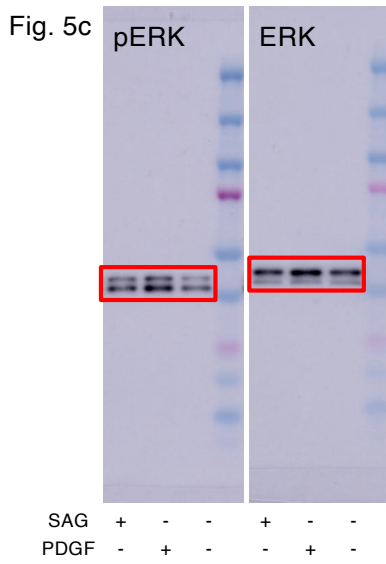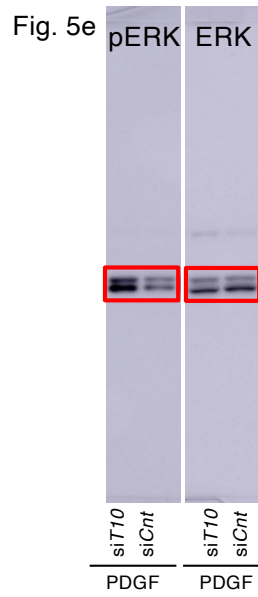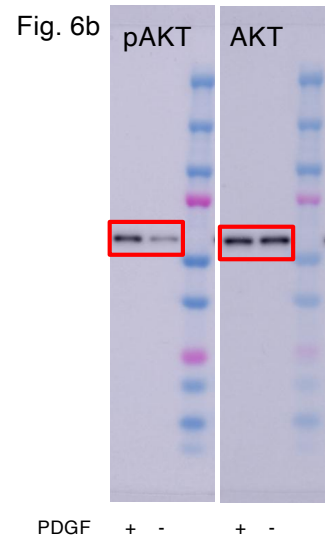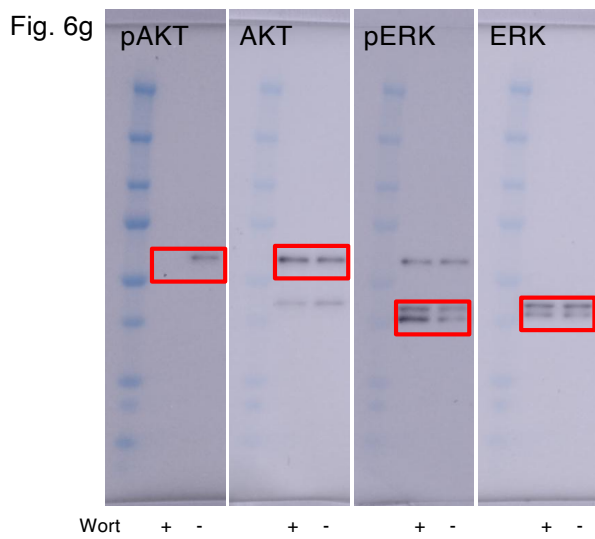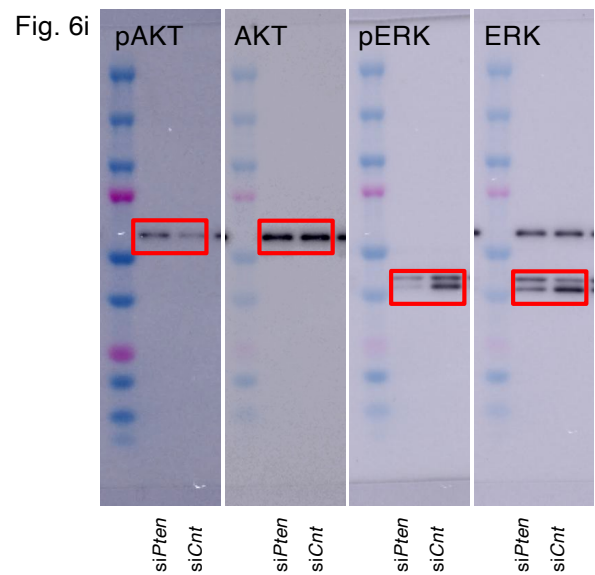

Supplemental Fig. 8, Full images of Western blotting

### Supplemental Table 1. Quality check of scRNA-seq datasets

|        | Sequenced cells | Analyzed cells | Total reads | Mean reads/cell |
|--------|-----------------|----------------|-------------|-----------------|
| S-EGFP | 92              | 80             | 22,278,747  | 242,160         |
| W-EGFP | 696             | 341            | 103,395,085 | 148,556         |

## Supplemental Table 2. Primers used for CEL-Seq2 analyses

|     | Primer (5' → 3')                                                                           |
|-----|--------------------------------------------------------------------------------------------|
| 1s  | GCCGGTAATACGACTCACTATAGGGAGTTCTACAGTCCGACGATCNNNNNNAGACTCTTTTTTTT<br>TTTTTTTTTTTTTTTTTV    |
| 3s  | GCCGGTAATACGACTCACTATAGGGAGTTCTACAGTCCGACGATCNNNNNNAGCTCATTTTTTTTT<br>TTTTTTTTTTTTTTTTTV   |
| 8s  | GCCGGTAATACGACTCACTATAGGGAGTTCTACAGTCCGACGATCNNNNNNCACTAGTTTTTTTTT<br>TTTTTTTTTTTTTTTTTV   |
| 9s  | GCCGGTAATACGACTCACTATAGGGAGTTCTACAGTCCGACGATCNNNNNNCAGATCTTTTTTTTTT<br>TTTTTTTTTTTTTTTTTV  |
| 10s | GCCGGTAATACGACTCACTATAGGGAGTTCTACAGTCCGACGATCNNNNNNTCACAGTTTTTTTTT<br>TTTTTTTTTTTTTTTTTV   |
| 18s | GCCGGTAATACGACTCACTATAGGGAGTTCTACAGTCCGACGATCNNNNNNTCGACATTTTTTTTTT<br>TTTTTTTTTTTTTTTTTV  |
| 25s | GCCGGTAATACGACTCACTATAGGGAGTTCTACAGTCCGACGATCNNNNNNGTGCACTTTTTTTTTT<br>TTTTTTTTTTTTTTTTTV  |
| 29s | GCCGGTAATACGACTCACTATAGGGAGTTCTACAGTCCGACGATCNNNNNNACCATGTTTTTTTTT<br>TTTTTTTTTTTTTTTTTV   |
| 32s | GCCGGTAATACGACTCACTATAGGGAGTTCTACAGTCCGACGATCNNNNNNACGTACTTTTTTTTTT<br>TTTTTTTTTTTTTTTTTV  |
| 35s | GCCGGTAATACGACTCACTATAGGGAGTTCTACAGTCCGACGATCNNNNNNCTAGACTTTTTTTTTT<br>TTTTTTTTTTTTTTTTTV  |
| 39s | GCCGGTAATACGACTCACTATAGGGAGTTCTACAGTCCGACGATCNNNNNNCTCAGATTTTTTTTTT<br>TTTTTTTTTTTTTTTTTV  |
| 44s | GCCGGTAATACGACTCACTATAGGGAGTTCTACAGTCCGACGATCNNNNNNTGCAACTTTTTTTTTT<br>TTTTTTTTTTTTTTTTTV  |
| 48s | GCCGGTAATACGACTCACTATAGGGAGTTCTACAGTCCGACGATCNNNNNNTGTGCACTTTTTTTTTT<br>TTTTTTTTTTTTTTTTTV |
| 57s | GCCGGTAATACGACTCACTATAGGGAGTTCTACAGTCCGACGATCNNNNNNAGTGAGTTTTTTTTT<br>TTTTTTTTTTTTTTTTTV   |
| 61s | GCCGGTAATACGACTCACTATAGGGAGTTCTACAGTCCGACGATCNNNNNNCAACCATTTTTTTTTT<br>TTTTTTTTTTTTTTTTTV  |
| 71s | GCCGGTAATACGACTCACTATAGGGAGTTCTACAGTCCGACGATCNNNNNNCTGTCTTTTTTTTTT<br>TTTTTTTTTTTTTTTTTV   |
| 72s | GCCGGTAATACGACTCACTATAGGGAGTTCTACAGTCCGACGATCNNNNNNGTCTCTTTTTTTTTT<br>TTTTTTTTTTTTTTTTTV   |
| 75s | GCCGGTAATACGACTCACTATAGGGAGTTCTACAGTCCGACGATCNNNNNNGTGAAGTTTTTTTTT<br>TTTTTTTTTTTTTTTTTV   |
| 77s | GCCGGTAATACGACTCACTATAGGGAGTTCTACAGTCCGACGATCNNNNNNACAGGATTTTTTTTTT<br>TTTTTTTTTTTTTTTTTV  |
| 83s | GCCGGTAATACGACTCACTATAGGGAGTTCTACAGTCCGACGATCNNNNNNCTTCTGTTTTTTTTT<br>TTTTTTTTTTTTTTTTTV   |
| 88s | GCCGGTAATACGACTCACTATAGGGAGTTCTACAGTCCGACGATCNNNNNNTGTTGTTTTTTTTT<br>TTTTTTTTTTTTTTTTTV    |
| 91s | GCCGGTAATACGACTCACTATAGGGAGTTCTACAGTCCGACGATCNNNNNNGAAGTGTTTTTTTTTT<br>TTTTTTTTTTTTTTTTTV  |
| 96s | GCCGGTAATACGACTCACTATAGGGAGTTCTACAGTCCGACGATCNNNNNNGAGTGATTTTTTTTTT<br>TTTTTTTTTTTTTTTTTV  |

### Supplemental Table 3. siRNA used for KD analyses

| Target protein          | Reference          |                                    |
|-------------------------|--------------------|------------------------------------|
| <i>siTmsb10</i>         | SASI_Mm01_00030122 | Sigma-Aldrich                      |
|                         | SASI_Mm02_00327896 | Sigma-Aldrich                      |
| <i>siTmsb4x</i>         | SASI_Mm01_00163777 | Sigma-Aldrich                      |
|                         | SASI_Mm01_00163779 | Sigma-Aldrich                      |
| <i>siAd4BP/SF-1</i>     | SASI_Mm01_00031635 | Sigma-Aldrich                      |
|                         | SASI_Mm01_00031636 | Sigma-Aldrich                      |
| <i>siRas (siKras)</i>   | SASI_Mm01_00165654 | Sigma-Aldrich                      |
| <i>siRas (siNras)</i>   | SASI_Mm02_00319691 | Sigma-Aldrich                      |
| <i>siAkt (siAkt1/2)</i> | Akt1/2siRNA (m)    | Santa Cruz Biotechnology, sc-43610 |
| <i>siPten</i>           | SASI_Mm02_00315033 | Sigma-Aldrich                      |
|                         | SASI_Mm01_00152659 | Sigma-Aldrich                      |

**Supplemental Table 4. Primary and secondary antibodies, and their dilution ratios used for immunostaining**

Primary antibodies

| Target protein | Source             | Reference                                  | Dilution |
|----------------|--------------------|--------------------------------------------|----------|
| EGFP           | Chicken polyclonal | Abcam (Cambridge, UK), ab13970             | 1:1000   |
| mCherry        | Mouse monoclonal   | Abcam, ab125096                            | 1:200    |
| LAMININ        | Rabbit polyclonal  | Sigma-Aldrich, L9393                       | 1:1000   |
| PECAM1         | Rat monoclonal     | BD Biosciences (San Jose, CA, USA), 557355 | 1:1000   |
| ARL13b         | Mouse monoclonal   |                                            | 1:500    |

Second antibodies

| Target protein | Source                                       | Reference                        | Dilution |
|----------------|----------------------------------------------|----------------------------------|----------|
| Chicken IgY    | Goat anti-chicken IgY H&L (ALEXA Fluor® 488) | Abcam, ab150169                  | 1:500    |
| Mouse IgG      | ALEXA Fluor® 555 goat anti-mouse IgG (H+L)   | Thermo Fisher Scientific, A21424 | 1:500    |
| Rabbit IgG     | Goat anti-rabbit IgG H&L (ALEXA Fluor® 647)  | Abcam, ab150083                  | 1:500    |
| Rabbit IgG     | ALEXA Fluor® 488 goat anti-rabbit IgG (H+L)  | Thermo Fisher Scientific, A11008 | 1:500    |
| Rat IgG        | ALEXA Fluor® 555 goat anti-rat IgG (H+L)     | Thermo Fisher Scientific, A21434 | 1:500    |

**Supplemental Table 5. Primers used for qRT-PCR analyses**

| Gene              | Forward (5' → 3')        | Reverse (5' → 3')         |
|-------------------|--------------------------|---------------------------|
| <i>Rn18s</i>      | CCATTCGAACGTCTGCCCTAT    | GTCACCCGTGGTCACCATG       |
| <i>EGFP</i>       | TATATCATGGCCGACAAGCA     | TGTTCTGCTGGTAGTGGTCG      |
| <i>Tmsb10</i>     | AAGCCGGACATGGGGGAAAT     | GTTCAATGGTCTCTTTGGTCGG    |
| <i>Pecam1</i>     | ACCAGTCCCCGAAGCAGCACT    | GTGGAGCAGCTGGCCTGGAC      |
| <i>Tmsb4x</i>     | TCCTCTGCCTTCAAAGAAACAAT  | AGAAGGCAATGCTCGTGGAA      |
| <i>Ad4BP/SF-1</i> | AAGCCACTCTGTAGGACCAAGC   | TGTAAATCTGACGCGAAAGCAG    |
| <i>Gli1</i>       | ACACAAGTGCACGTTTGAAGG    | TCTCATTGGAGTGGGTCCGA      |
| <i>Kras</i>       | AGATGTGCCTATGGTCCTGGTAG  | CAATCTGACTGTCGGATCTCTCTC  |
| <i>Nras</i>       | CAAGGACAGTTGACACAAAGC    | TGTCTTACTACATCAGCACACAG   |
| <i>Akt1</i>       | ATGAACGACGTAGCCATTGTG    | TTGTAGCCAATAAAGGTGCCAT    |
| <i>Akt2</i>       | ACGTGGTGAATACATCAAGACC   | GCTACAGAGAAATTGTTTCAGGGG  |
| <i>Pten</i>       | AATTCCCAGTCAGAGGCGCTATGT | GATTGCAAGTTCGCGCCACTGAACA |

**Supplemental Table 6. Primary and secondary antibodies, and their dilution ratios used for Western blotting analyses**

Primary antibodies

| Target protein | Source            | Reference                                              | Dilution |
|----------------|-------------------|--------------------------------------------------------|----------|
| pan-RAS        | Mouse monoclonal  | Santa Cruz Biotechnology (Lake Placid, NY, USA), sc-32 | 1:2000   |
| FLAG           | Mouse monoclonal  | Sigma-Aldrich; F1804                                   | 1:5000   |
| pERK           | Mouse monoclonal  | Santa Cruz Biotechnology, sc-7383                      | 1:2000   |
| ERK            | Rabbit polyclonal | Cell Signaling Technology (Danvers, MA, USA), 4695     | 1:2000   |
| pAKT           | Rabbit polyclonal | Cell Signaling Technology, 4060                        | 1:2000   |
| AKT            | Rabbit polyclonal | Cell Signaling Technology, 4691                        | 1:2000   |

Horseradish peroxidase-conjugated second antibodies

| Target protein | Source                 | Reference                                              | Dilution |
|----------------|------------------------|--------------------------------------------------------|----------|
| Mouse IgG      | Goat anti-mouse IgG    | PerkinElmer Biosciences (Boston, MA, USA), NEF822001EA | 1:5000   |
| Rabbit IgG     | Donkey anti-rabbit IgG | GE Healthcare, NA9340V                                 | 1:5000   |

## Supplemental Table 7. Primers used for construction

| Expression plasmid                                           |                                                                 |                                                                 |
|--------------------------------------------------------------|-----------------------------------------------------------------|-----------------------------------------------------------------|
| Gene                                                         | Forward (5' → 3')                                               | Reverse (5' → 3')                                               |
| Tmsb10<br>(HindIII/BglIII)                                   | ACAAAGCTTATGGCAGACAAGCCGGA<br>CATG                              | ACAAGATCTTTAGGAGATTTCACTCCT<br>CT                               |
| Kras<br>(Sall/NotI)                                          | ACAGTCGACCATGACTGAGTATAAAC<br>TTGT                              | ACAGCGGCCGCTCACATAACTGTACA<br>CCTTG                             |
| Donor plasmid                                                |                                                                 |                                                                 |
| Gene                                                         | Forward (5' → 3')                                               | Reverse (5' → 3')                                               |
| Tmsb10_HA1/2<br>(Sall/EcoRI)                                 | ATAGTCGACAGAAGGAGACTCTGGAG<br>AGCAAACG                          | ATAGAATTCCGCATTAAGGGCGAAGC<br>AACTGAG                           |
| mCherry<br>(EcoRI/BglIII)                                    | ACAGAATTCGGATGGTGAGCAAGGGC<br>GAGGA                             | ACAAGATCTCTACTTGTACAGCTCGTC<br>CA                               |
| Tmsb10_HA1                                                   | ATAGTCGACAGAAGGAGACTCTGGAG<br>AGCAAACG                          | ATCGTATGGGTACATTTTCTTACAAC<br>CTGATGGGCGAAACAAGGTGA             |
| HA-mCherry-<br>T2A                                           | ATGTACCCATACGATGTTCC                                            | ACGTCACCGCATGTCAGCAGACTGCC<br>TCTGCCCTCCTTGTACAGCTCGTCCA<br>TGC |
| Tmsb10_HA2                                                   | GACATGCGGTGACGTGGAAGAGAATC<br>CCGGCCCTATGGCAGACAAGCCGGA<br>CATG | ATAGAATTCCGCATTAAGGGCGAAGC<br>AACTGAG                           |
| Tmsb10 guide RNA (gRNA)                                      |                                                                 |                                                                 |
| gRNA (5' → 3')                                               |                                                                 |                                                                 |
| CCATCAGAGTTGTAAGAAAATGG                                      |                                                                 |                                                                 |
| gRNA preparation                                             |                                                                 |                                                                 |
| Tmsb10 gRNA template (5' → 3')                               |                                                                 |                                                                 |
| CTAATACGACTCACTATAGCCATCAGAGTTGTAAGAAAAGTTTTAGAGCTAGAAATAGCA |                                                                 |                                                                 |
| Genotyping                                                   |                                                                 |                                                                 |
|                                                              | Forward (5' → 3')                                               | Reverse (5' → 3')                                               |
| mCherry F1<br>/Tmsb10 R1                                     | CGCCGACATCCCCGACTACTT                                           | TCTTCAGCTTGGCCTTATCG                                            |
| Tmsb10 F2/R2                                                 | ACCTCCGCCCTTAGACAATG                                            | GTGCGTGAAAGGTTAAGAGG                                            |
